# Supplementary material for: Using polymorphism to master the spin crossover mechanism in [Fe(PM-PeA)2(NCSe)2]
Source: Royal Society of Chemistry journal article supplement (doi:10.1039/c9ce01137d), 2019-01-01
Supplement: c9ce01137d1.pdf [file c9ce01137d1.pdf]

## Polymorphism to master the spin crossover mechanism in

### [Fe(PM-PeA)<sub>2</sub>(NCSe)<sub>2</sub>]

Elodie TAILLEUR<sup>a</sup>, Mathieu MARCHIVIE<sup>a</sup>, Philippe NEGRIER<sup>b</sup>, Dominique DENUX<sup>a</sup>, Stéphane MASSIP<sup>c</sup>, Denise MONDIEIG<sup>b</sup>, Guillaume CHASTANET<sup>a</sup>, Philippe GUIONNEAU<sup>a</sup>

**Figure 1:** X-ray pattern recorded at room temperature (red circle), calculated diffractogram (black line) and the difference curve (blue line) of the polymorph-II of the molecular complex [Fe(PM-PeA)<sub>2</sub>(NCSe)<sub>2</sub>] in the HS state, with the Bragg positions in green. .... 2

**Figure 2:**  $\chi_M T$  as function of temperature determined on polymorph-I (a) batch 1 (b) and batch 2 and (c) on polymorph-II. Rietveld refinement on PXRD pattern recorded at room temperature in the HS state for polymorph-I (d) batch 1 (e) and batch 2 and (f) on polymorph-II ..... 3

**Figure 3:** X-ray pattern recorded at room temperature showing the coexistence of the two polymorphs of the molecular complex [Fe(PM-PeA)<sub>2</sub>(NCSe)<sub>2</sub>], in the HS state, with characteristic Bragg peaks from each polymorph highlighted by arrows. .... 4

**Figure 4:** Characteristic Bragg peaks of (a) polymorph-I and (b) polymorph-II in the HS state, at room temperature. Differences between both polymorphs are highlighted by gray areas. .... 5

**Figure 5:** X-ray pattern recorded at room temperature in a pressure cell environment (red circle), without pressure (top) with a pressure of 12.426 kbar (down), the calculated diffractograms (black line), the difference curve (blue line) and the Bragg positions (green) for the polymorph-II of the molecular complex [Fe(PM-PeA)<sub>2</sub>(NCSe)<sub>2</sub>]. PXRD patterns recorded with  $\lambda=0.4859$  Å. .... 6

**Figure 6:** Labelling of the atoms of the asymmetric unit of mP2<sub>1</sub>/c (HS) phase of polymorph-I of [Fe(PM-PeA)<sub>2</sub>(NCSe)<sub>2</sub>]. For more clarity, H atoms have been removed but their labelling are identical to the one of C atom they are bonded to. .... 9

**Figure 7:** Labelling of the atoms of the asymmetric unit of mP2<sub>1</sub>/c (HS) phase of polymorph-II of [Fe(PM-PeA)<sub>2</sub>(NCSe)<sub>2</sub>]. For more clarity, H atoms have been removed but their labelling are identical to the one of C atom they are bonded to. .... 9

**Figure 8:** (a)-(d) Temperature dependences of lattice parameters and (e) evolution in temperature of the volume of the unit-cell of [Fe(PM-PeA)<sub>2</sub>(NCSe)<sub>2</sub>], polymorph-II ..... 10

**Table 1:** Elementary analysis on the crystalline powder of both polymorphs of [Fe(PM-PeA)<sub>2</sub>(NCSe)<sub>2</sub>] complex. .... 2

**Table 2:** Strategy for the data collection to determine the crystal structure of polymorph-II of [Fe(PM-PeA)<sub>2</sub>(NCSe)<sub>2</sub>] complex, at room temperature. .... 7

**Table 3:** Strategy for the data collection to determine the crystal structure of polymorph-II of [Fe(PM-PeA)<sub>2</sub>(NCSe)<sub>2</sub>] complex, at 100 K. .... 8

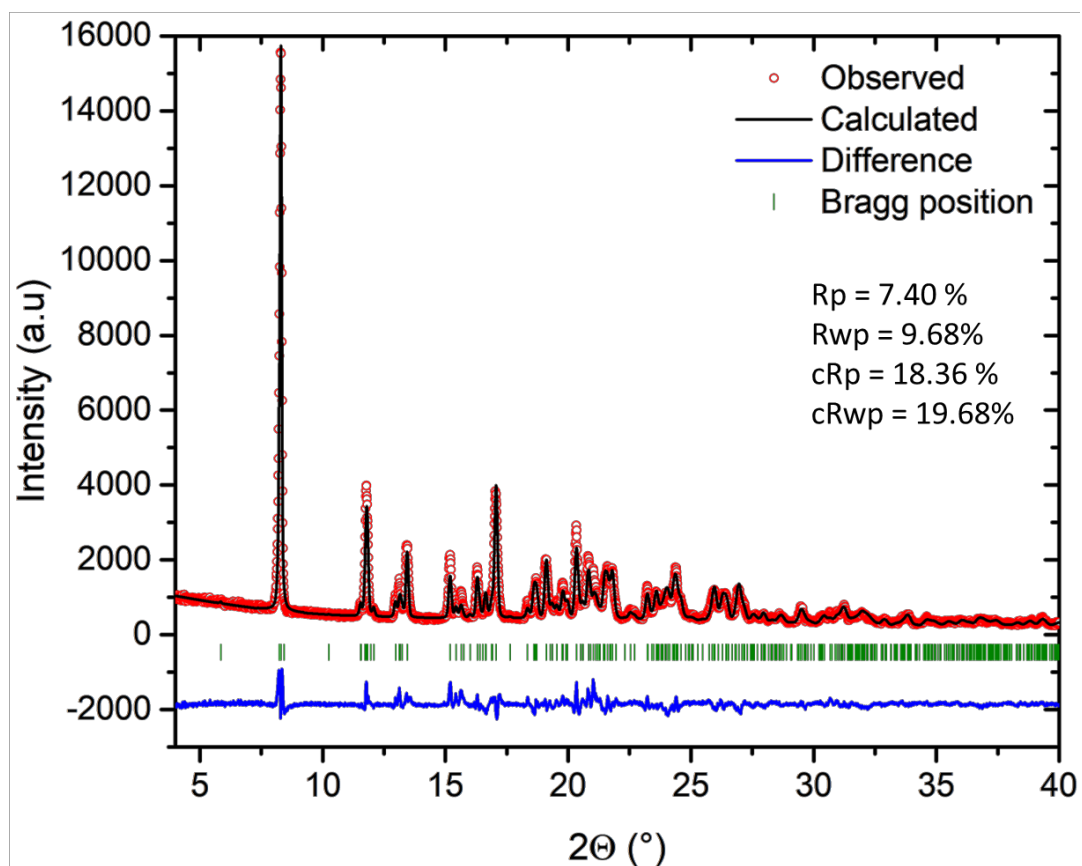

Figure 1: X-ray pattern recorded at room temperature (red circle), calculated diffractogram (black line) and the difference curve (blue line) of the polymorph-II of the molecular complex  $[\text{Fe}(\text{PM-PeA})_2(\text{NCSe})_2]$  in the HS state, with the Bragg positions in green.

Table 1: Elementary analysis on the crystalline powder of both polymorphs of  $[\text{Fe}(\text{PM-PeA})_2(\text{NCSe})_2]$  complex.

| % atomic     | C     | H    | N     | Fe   | Se    |
|--------------|-------|------|-------|------|-------|
| Calculated   | 60.74 | 3.40 | 10.12 | 6.73 | 19.02 |
| Polymorph-I  | 59.60 | 3.69 | 9.82  | 6.58 | 16.59 |
| Polymorph-II | 57.85 | 3.24 | 9.86  | 6.37 | 15.38 |

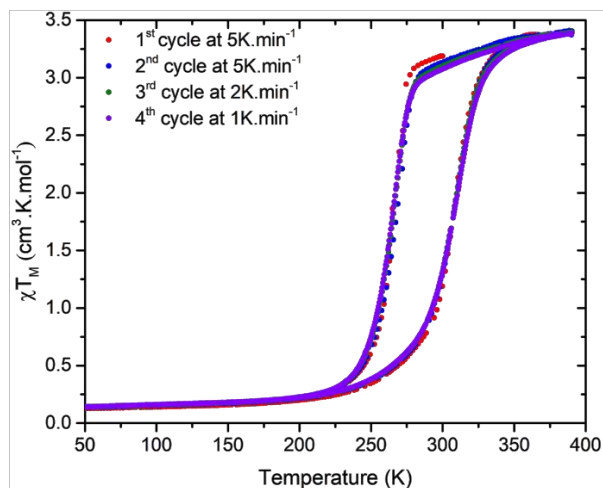

(a)

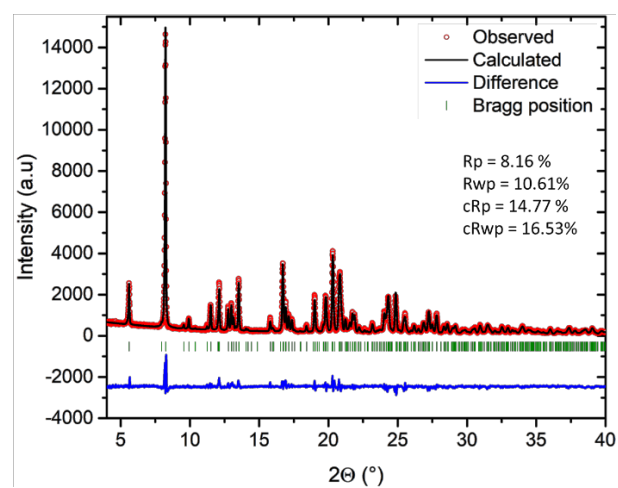

(d)

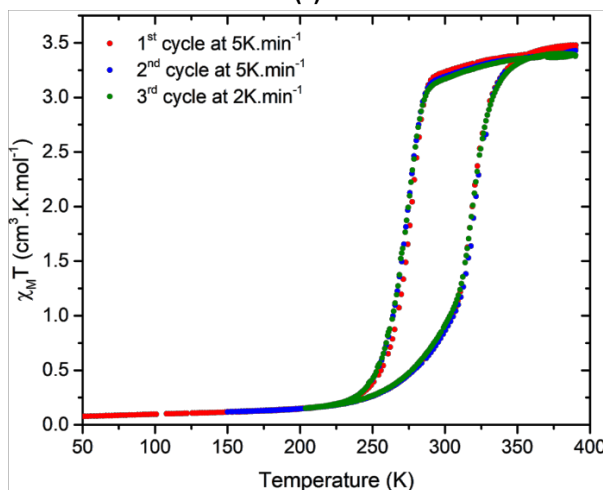

(b)

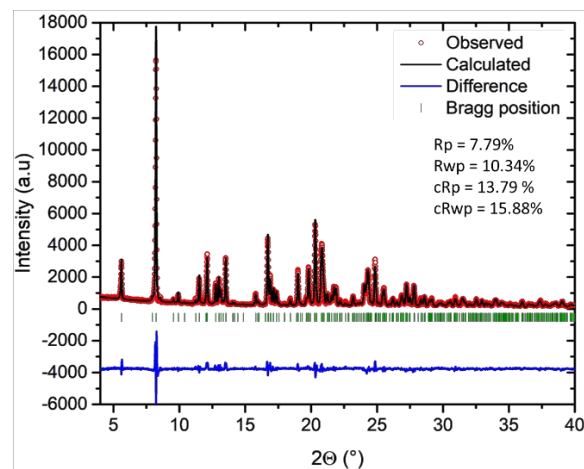

(e)

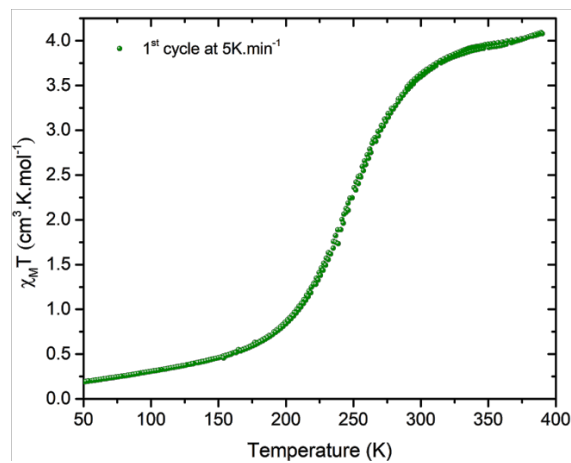

(c)

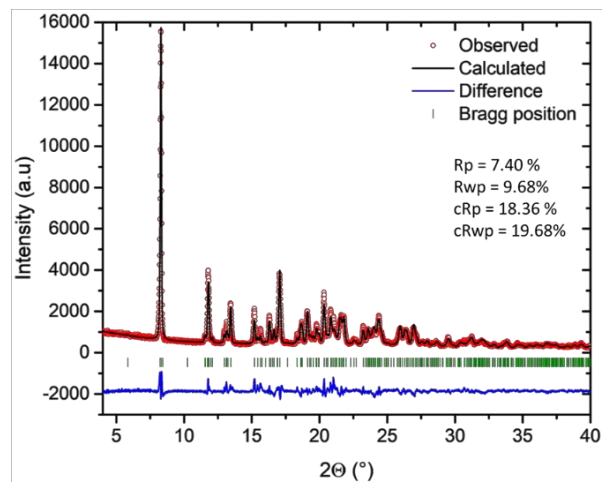

(f)

Figure 2:  $\chi_M T$  as function of temperature determined on polymorph-I (a) batch 1 (b) and batch 2 and (c) on polymorph-II. Rietveld refinement on PXRD pattern recorded at room temperature in the HS state for polymorph-I (d) batch 1 (e) and batch 2 and (f) on polymorph-II.

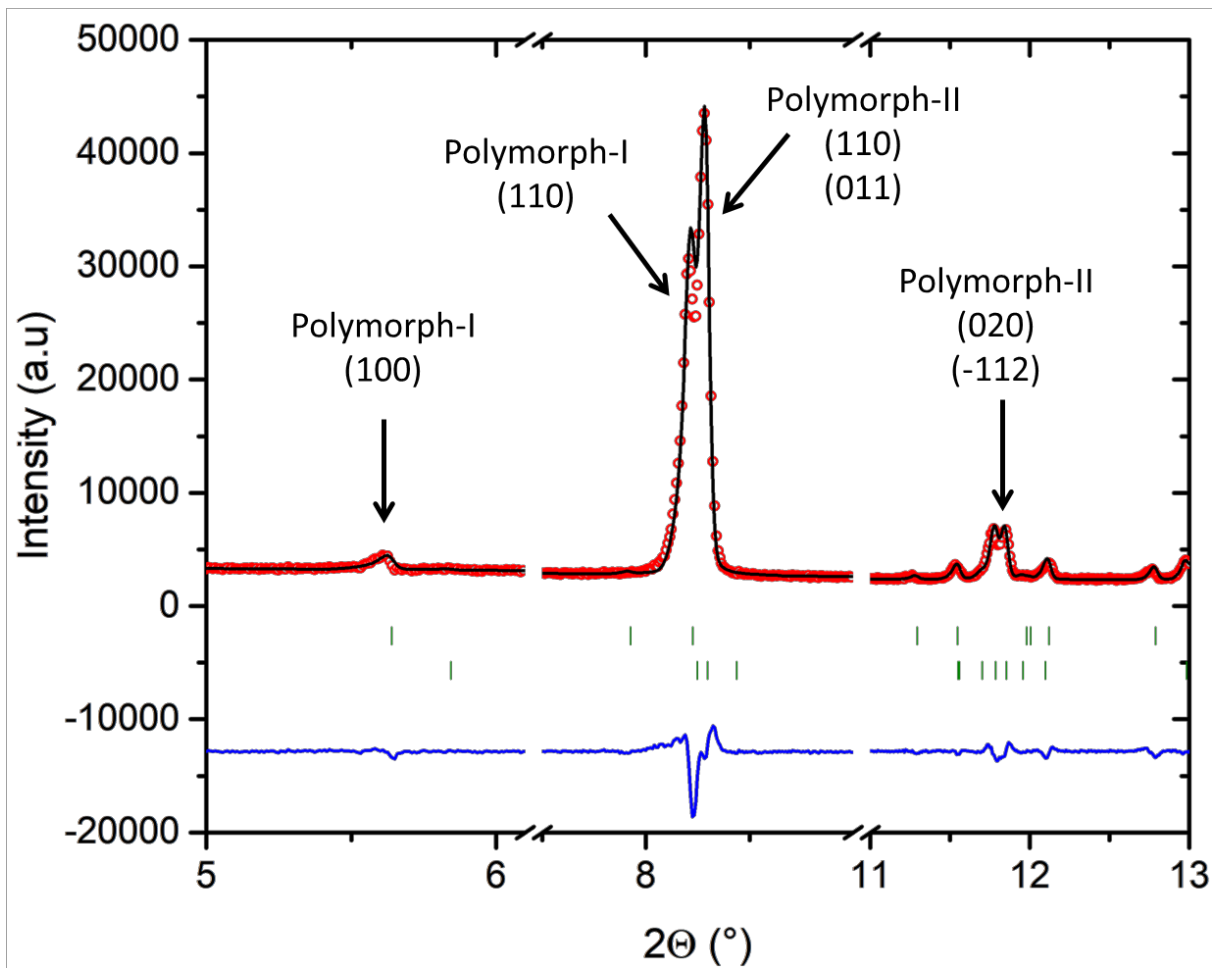

Figure 3: X-ray pattern recorded at room temperature showing the coexistence of the two polymorphs of the molecular complex  $[\text{Fe}(\text{PM-PeA})_2(\text{NCSe})_2]$ , in the HS state, with characteristic Bragg peaks from each polymorph highlighted by arrows.

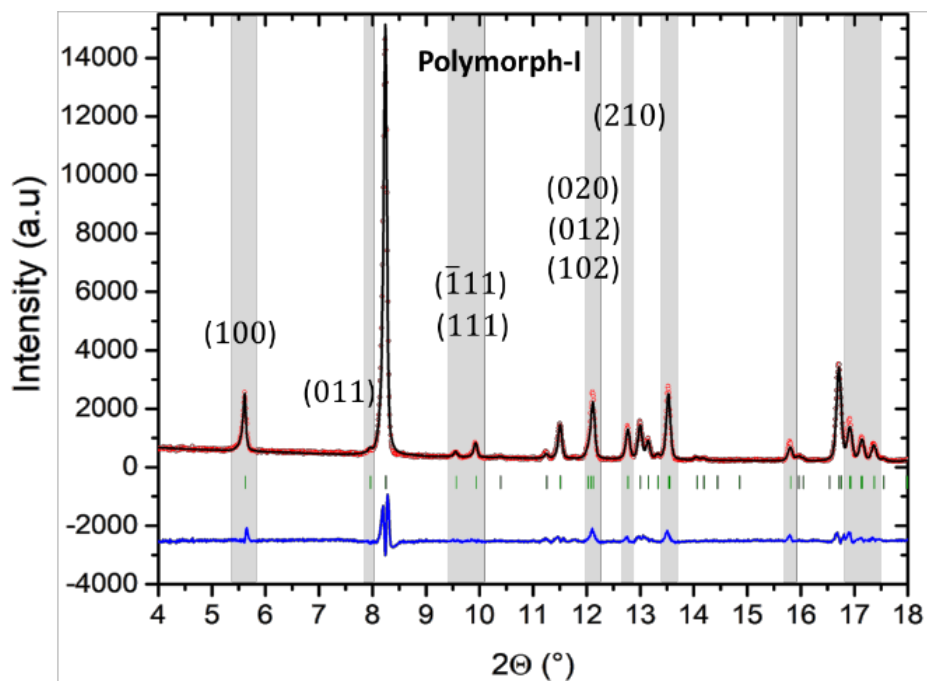

(a)

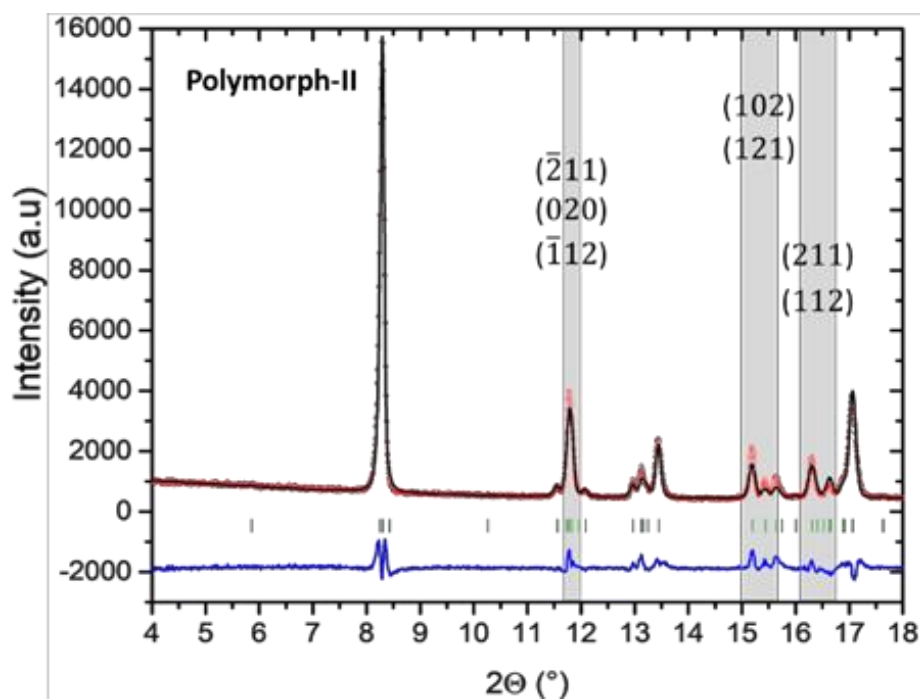

(b)

Figure 4: Characteristic Bragg peaks of (a) polymorph-I and (b) polymorph-II in the HS state, at room temperature. Differences between both polymorphs are highlighted by gray areas.

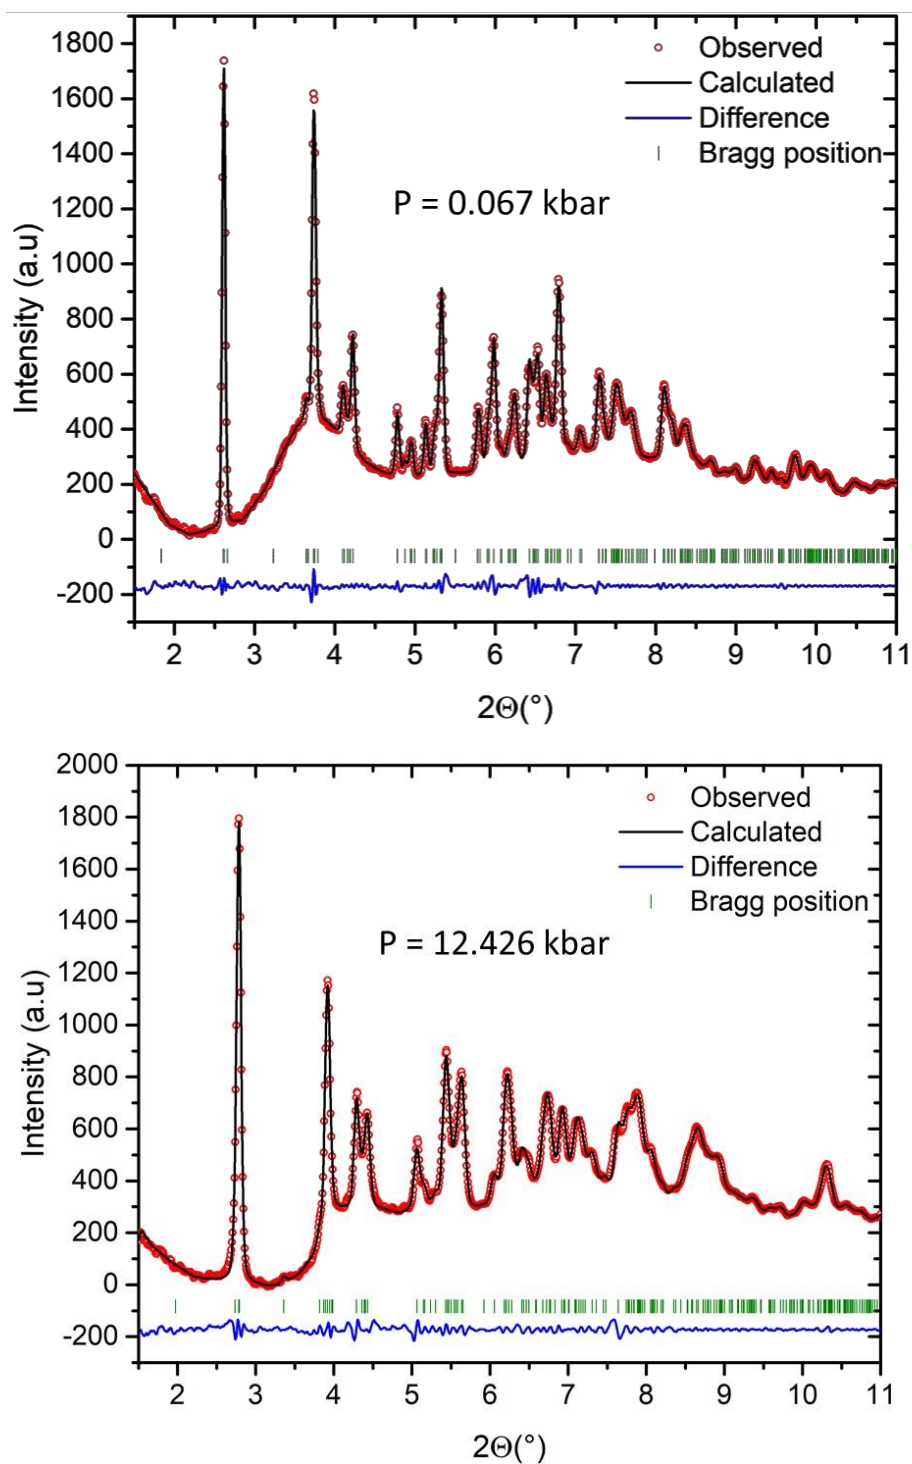

Figure 5: X-ray pattern recorded at room temperature in a pressure cell environment (red circle), without pressure (top) with a pressure of 12.426 kbar (down), the calculated diffractograms (black line), the difference curve (blue line) and the Bragg positions (green) for the polymorph-II of the molecular complex  $[\text{Fe}(\text{PM-PeA})_2(\text{NCSe})_2]$ . PXRD patterns recorded with  $\lambda=0.4859$  Å.

Two complete collections of the diffracted intensities (293 K and 100 K) were carried out [1] on the same single-crystal, having a size of approximately 10x10x50  $\mu\text{m}^3$ . The single-crystal was mounted on a polymer pen and positioned in the diffractometer, a Rigaku FRX microfocus with a copper rotating anode (Cu-K $\alpha$ ,  $\lambda = 1.54184 \text{ \AA}$ ) associated with a hybrid Dectris Pilatus 200 K detector. The strategies for data collection were calculated for a monoclinic P2/m system and are given in the table 2 and table 3, respectively.

CrysalisPro software [2] was used to perform the data reduction. The crystal structures were solved by the direct methods and the atomic parameters were refined by the least squares method using the SHELX [3] suite in the Olex2 environment [4].

*Table 2: Strategy for the data collection to determine the crystal structure of polymorph-II of  $[\text{Fe}(\text{PM-PeA})_2(\text{NCSe})_2]$  complex, at room temperature.*

|                                | Dx (mm) | 2 $\theta$ (°) | $\omega$ (°) | $\phi$ (°) | $\chi$ (°) | $t_{\text{exp}}$ (s) | %/image (°) | Lenght of $\omega$ scan (°) |
|--------------------------------|---------|----------------|--------------|------------|------------|----------------------|-------------|-----------------------------|
| 1 <sup>st</sup> $\omega$ scan  | 45      | -105           | -195         | 144        | 24         | 25                   | 1           | 180                         |
| 2 <sup>nd</sup> $\omega$ scan  | 45      | 5              | -38          | 144        | 24         | 5                    | 1           | 48                          |
| 3 <sup>rd</sup> $\omega$ scan  | 45      | -105           | -164         | -180       | 60         | 25                   | 1           | 149                         |
| 4 <sup>th</sup> $\omega$ scan  | 45      | -41            | -131         | -144       | 60         | 5                    | 1           | 180                         |
| 5 <sup>th</sup> $\omega$ scan  | 45      | -105           | -178         | 108        | 60         | 25                   | 1           | 126                         |
| 6 <sup>th</sup> $\omega$ scan  | 45      | -105           | -195         | -36        | 48         | 25                   | 1           | 149                         |
| 7 <sup>th</sup> $\omega$ scan  | 45      | -41            | -131         | 0          | 36         | 5                    | 1           | 180                         |
| 8 <sup>th</sup> $\omega$ scan  | 45      | -105           | -164         | -144       | 60         | 25                   | 1           | 131                         |
| 9 <sup>th</sup> $\omega$ scan  | 45      | -105           | -182         | 144        | 60         | 25                   | 1           | 94                          |
| 10 <sup>th</sup> $\omega$ scan | 45      | -105           | -194         | -108       | 60         | 25                   | 1           | 132                         |
| 11 <sup>th</sup> $\omega$ scan | 45      | -41            | -124         | 0          | 60         | 5                    | 1           | 54                          |
| 12 <sup>th</sup> $\omega$ scan | 45      | -105           | -195         | -36        | 60         | 25                   | 1           | 80                          |

Table 3: Strategy for the data collection to determine the crystal structure of polymorph-II of  $[\text{Fe}(\text{PM-PeA})_2(\text{NCSe})_2]$  complex, at 100K.

|                                | Dx (mm) | 2 $\theta$ (°) | $\omega$ (°) | $\phi$ (°) | $\chi$ (°) | $t_{\text{exp}}$ (s) | °/image (°) | Lenght of $\omega$ scan (°) |
|--------------------------------|---------|----------------|--------------|------------|------------|----------------------|-------------|-----------------------------|
| 1 <sup>st</sup> $\omega$ scan  | 45      | -105           | -195         | -36        | 60         | 20                   | 1           | 180                         |
| 2 <sup>nd</sup> $\omega$ scan  | 45      | 5              | -85          | -108       | 48         | 5                    | 1           | 48                          |
| 3 <sup>rd</sup> $\omega$ scan  | 45      | -105           | -195         | 144        | 36         | 20                   | 1           | 180                         |
| 4 <sup>th</sup> $\omega$ scan  | 45      | -41            | -131         | -108       | 60         | 10                   | 1           | 180                         |
| 5 <sup>th</sup> $\omega$ scan  | 45      | -105           | -195         | -108       | 60         | 20                   | 1           | 180                         |
| 6 <sup>th</sup> $\omega$ scan  | 45      | -105           | -194         | 72         | 48         | 20                   | 1           | 179                         |
| 7 <sup>th</sup> $\omega$ scan  | 45      | -41            | -105         | -72        | 48         | 10                   | 1           | 153                         |
| 8 <sup>th</sup> $\omega$ scan  | 45      | -105           | -184         | -72        | 12         | 20                   | 1           | 57                          |
| 9 <sup>th</sup> $\omega$ scan  | 45      | -41            | -128         | 72         | 36         | 10                   | 1           | 61                          |
| 10 <sup>th</sup> $\omega$ scan | 45      | -105           | -179         | -144       | 60         | 20                   | 1           | 45                          |
| 11 <sup>th</sup> $\omega$ scan | 45      | -105           | -60          | -108       | 12         | 20                   | 1           | 45                          |
| 12 <sup>th</sup> $\omega$ scan | 45      | -105           | -190         | 0          | 60         | 20                   | 1           | 45                          |
| 13 <sup>th</sup> $\omega$ scan | 45      | -105           | -158         | -72        | 60         | 20                   | 1           | 84                          |
| 14 <sup>th</sup> $\omega$ scan | 45      | -105           | -195         | 72         | 60         | 20                   | 1           | 80                          |

#### References :

- [1] CrystalClear-SMExpert 2.1 (Rigaku, Jun 7th 2013) Software, Version 5.6.2.0, Tokyo, Japan.  
**[2]** Oxford Diffraction/ Agilent Technologies UK Ltd, **n.d.**  
[3] (a) G. M. Sheldrick, *Acta Crystallogr. Sect. A Found. Crystallogr.* **2008**, *64*, 112–122 (b) G. M. Sheldrick, *Acta Crystallogr. Sect. C Struct. Chem.* **2015**, *71*, 3–8.  
[4] O. V. Dolomanov, L. J. Bourhis, R. J. Gildea, J. A. K. Howard, H. Puschmann, *J. Appl. Crystallogr.* **2009**, *42*, 339–341.



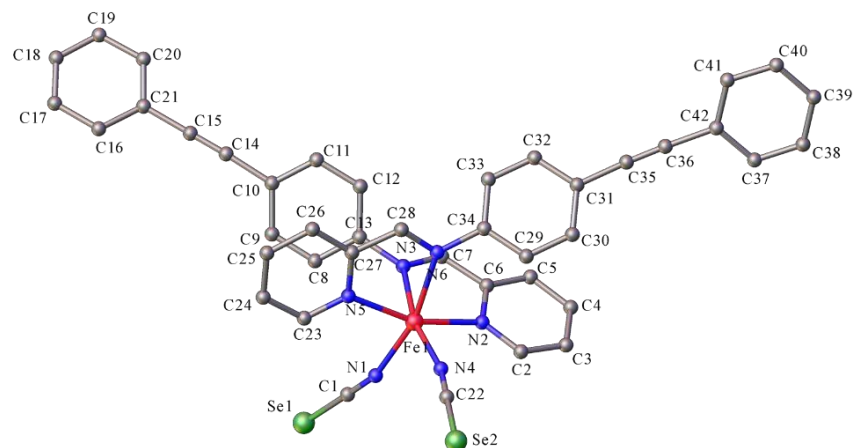

Figure 6: Labelling of the atoms of the asymmetric unit of  $mP2_1/c$  (HS) phase of polymorph-I of  $[\text{Fe}(\text{PM-PeA})_2(\text{NCSe})_2]$ . For more clarity, H atoms have been removed but their labelling are identical to the one of C atom they are bonded to.

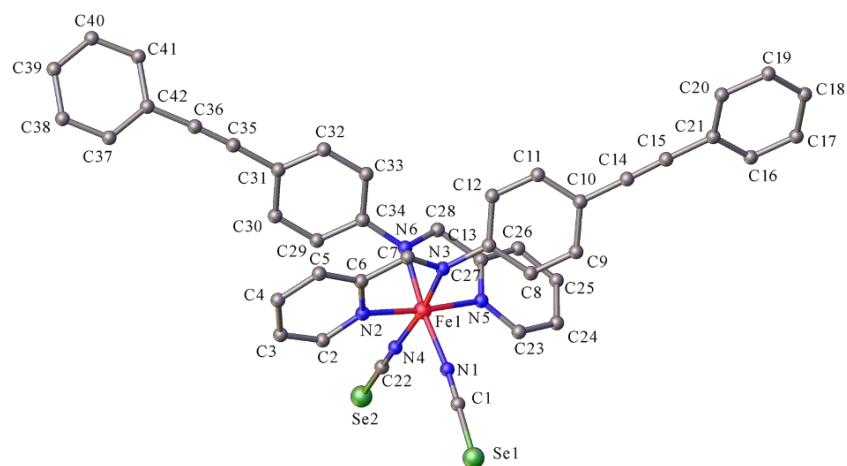

Figure 7: Labelling of the atoms of the asymmetric unit of  $mP2_1/c$  (HS) phase of polymorph-II of  $[\text{Fe}(\text{PM-PeA})_2(\text{NCSe})_2]$ . For more clarity, H atoms have been removed but their labelling are identical to the one of C atom they are bonded to.

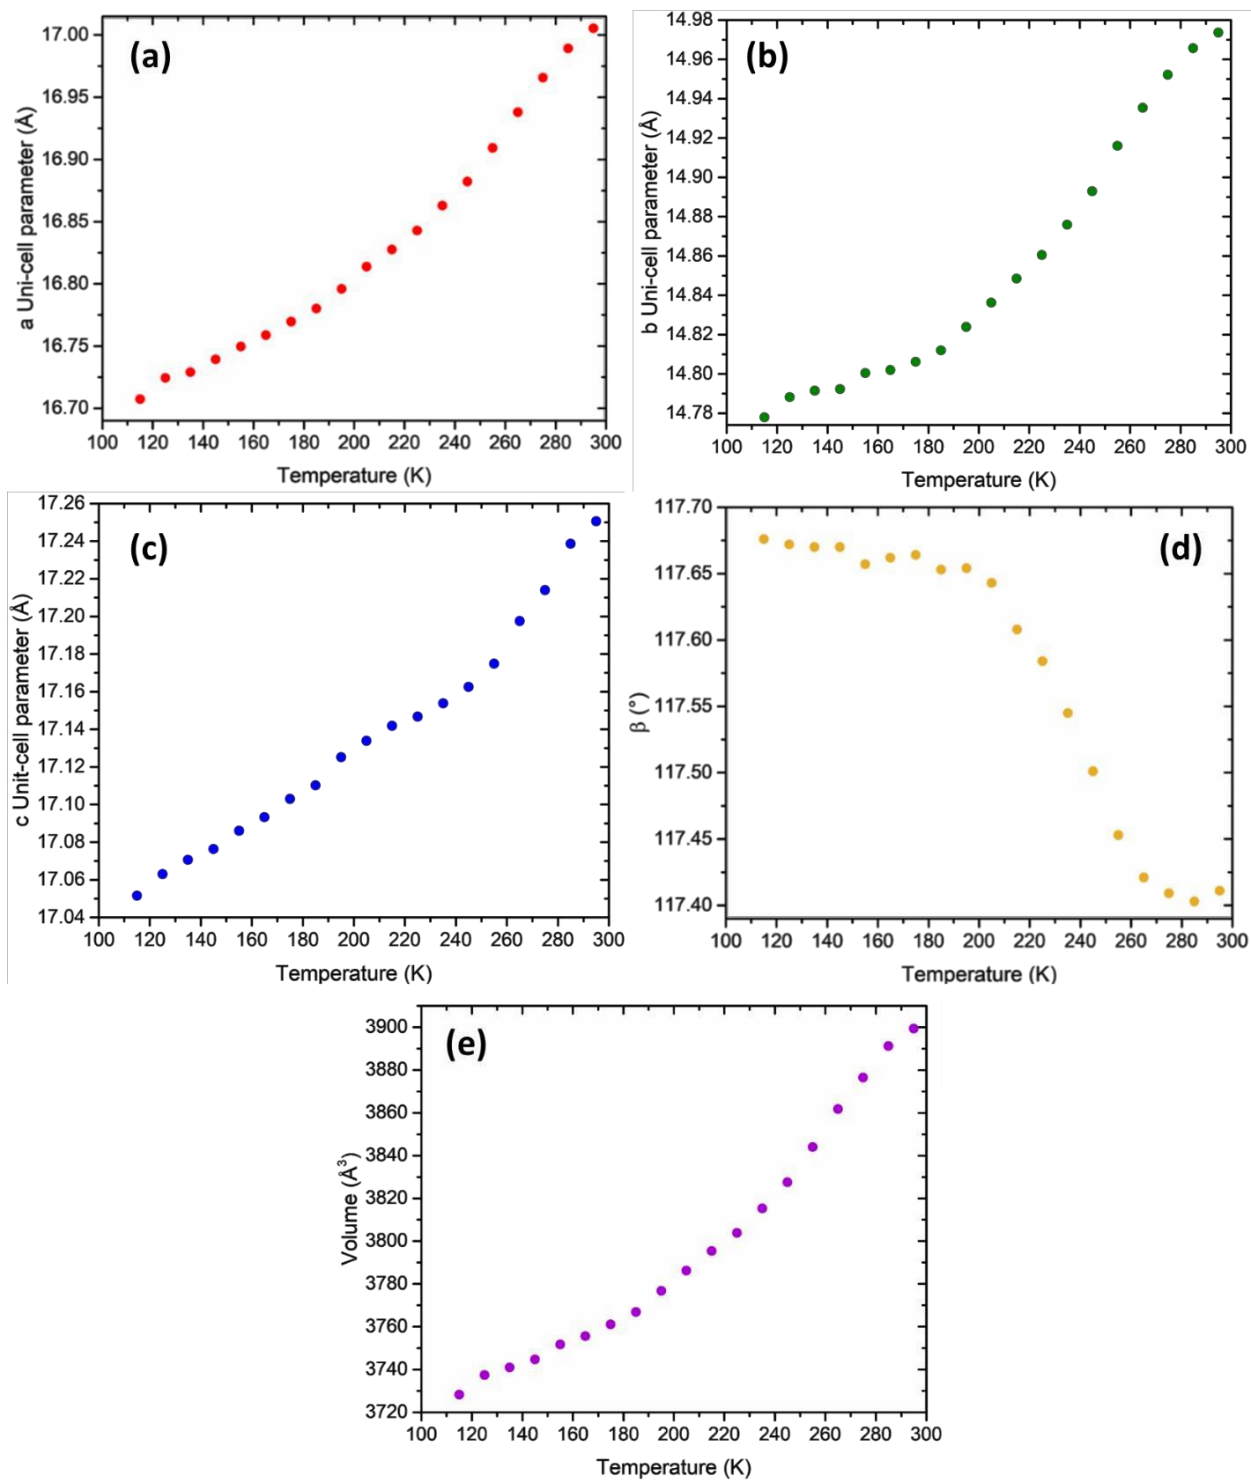

Figure 8: (a)-(d) Temperature dependences of lattice parameters and (e) evolution in temperature of the volume of the unit-cell of of  $[\text{Fe}(\text{PM-PeA})_2(\text{NCSe})_2]$ , polymorph-II
